# Supplementary figures and images for: Distinct hippocampal-cortical memory representations for experiences associated with movement versus immobility
Source: eLife journal article supplement (doi:10.7554/elife.27621), 2017-08-03

Figure 4 - figure supplement 8

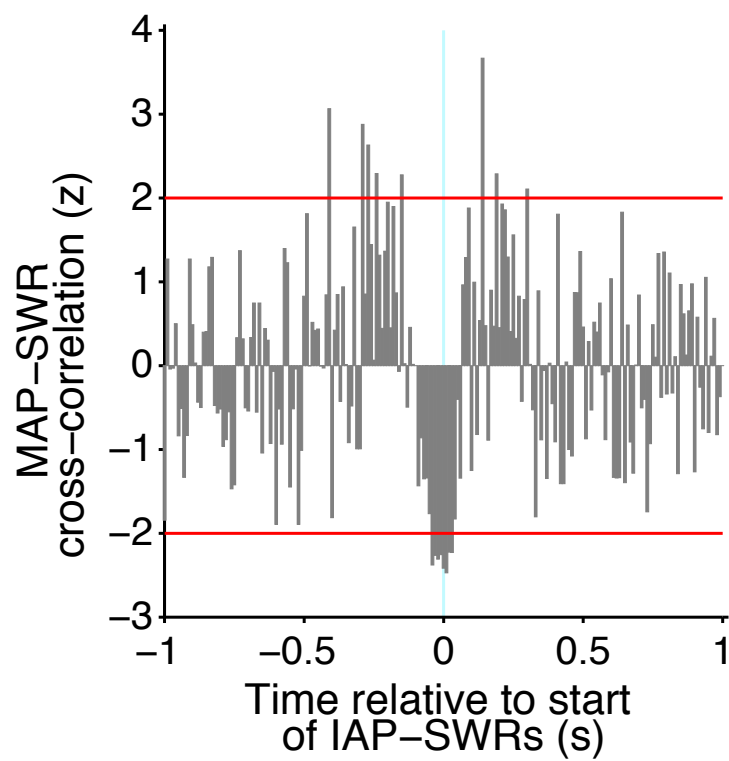

Supplement: supp [file elife-27621-supp-v1.zip]

Figure 1 - figure supplement 1

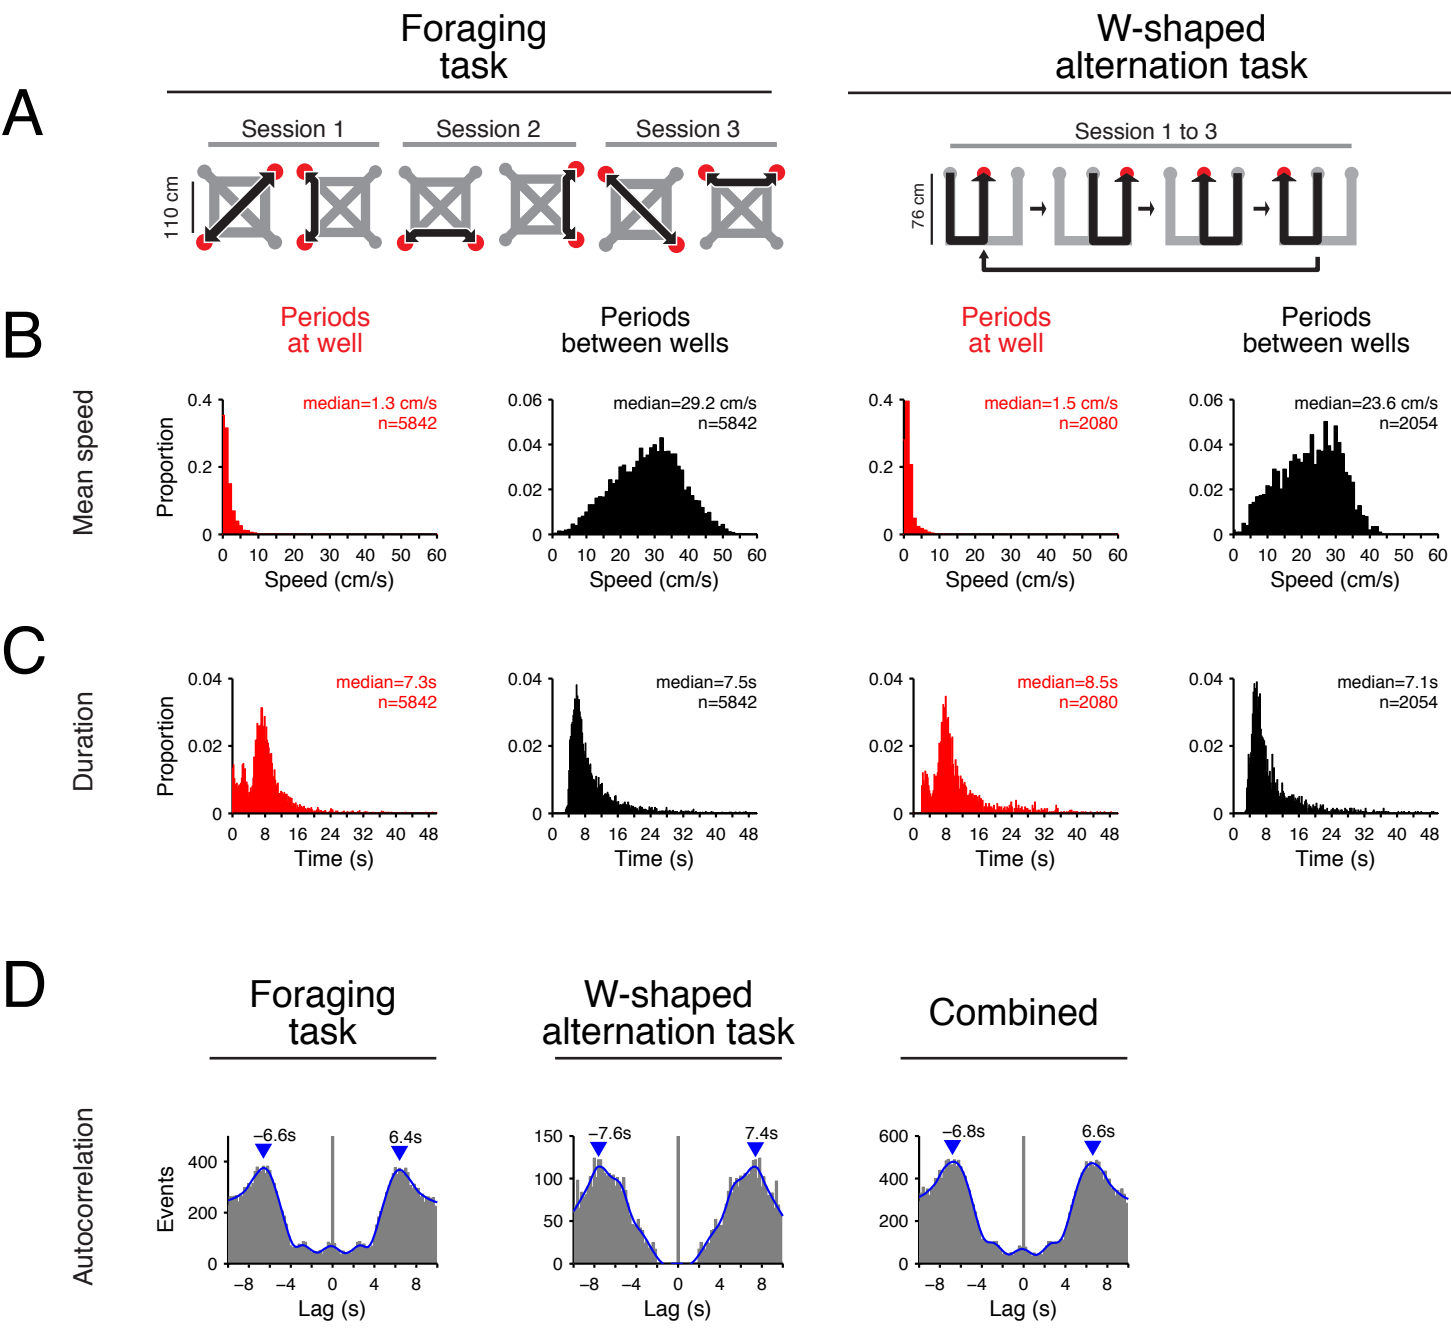

Supplement: supp [file elife-27621-supp-v1.zip]

Figure 4 - figure supplement 9

A

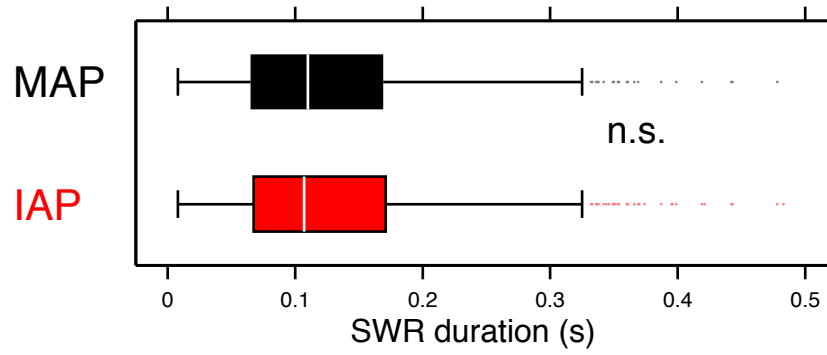

B

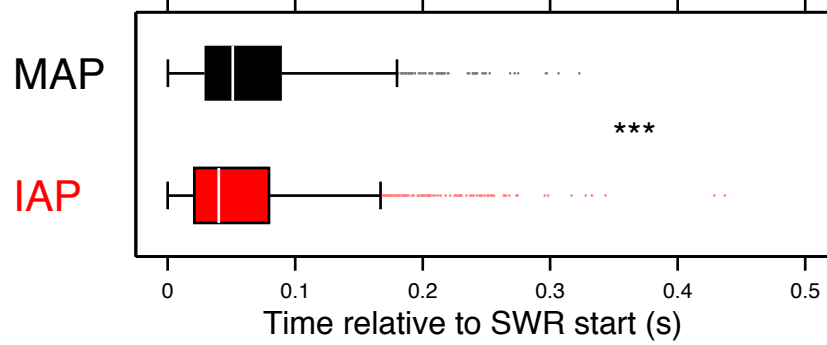

Supplement: supp [file elife-27621-supp-v1.zip]

Figure 4 - figure supplement 7

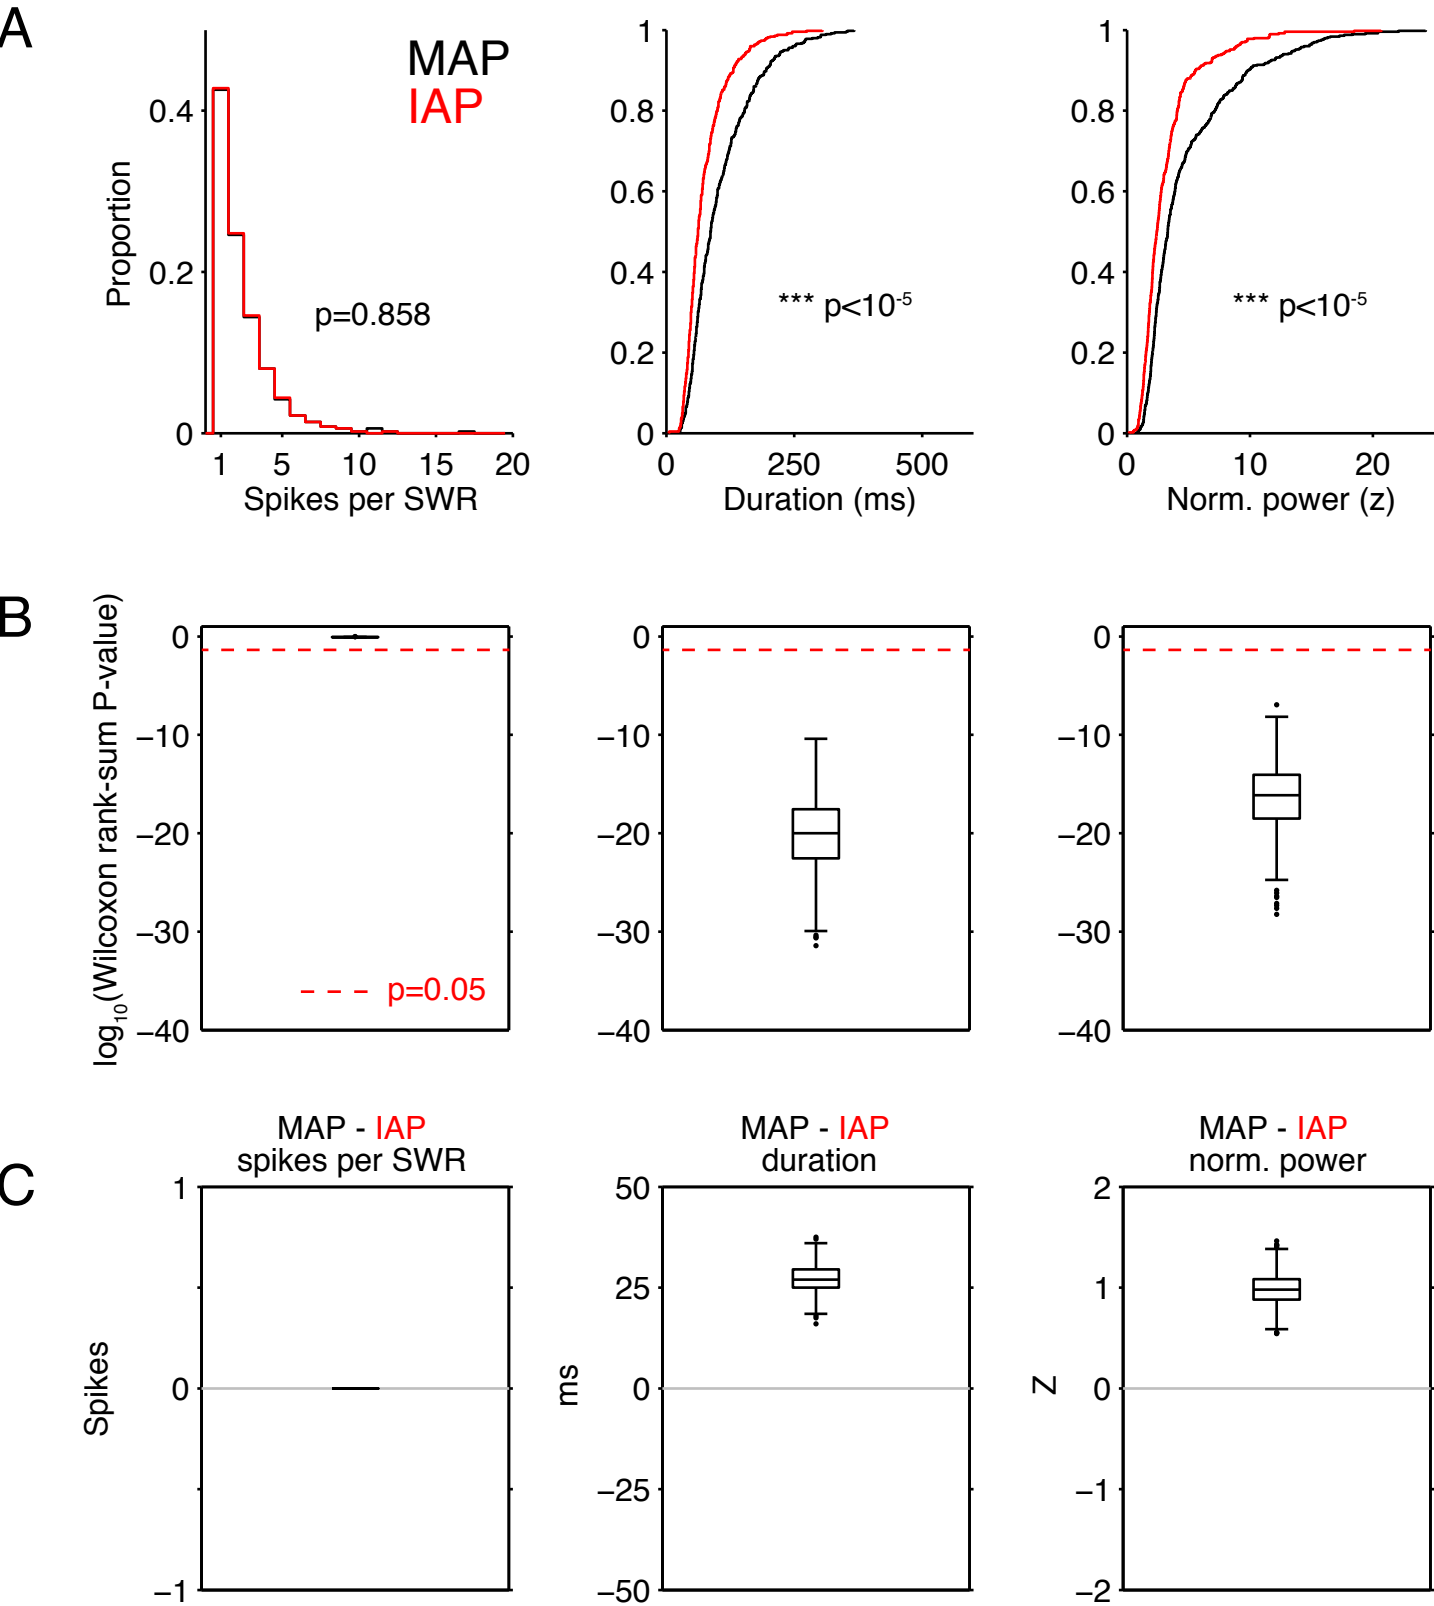

Supplement: supp [file elife-27621-supp-v1.zip]

Figure 3 - figure supplement 2

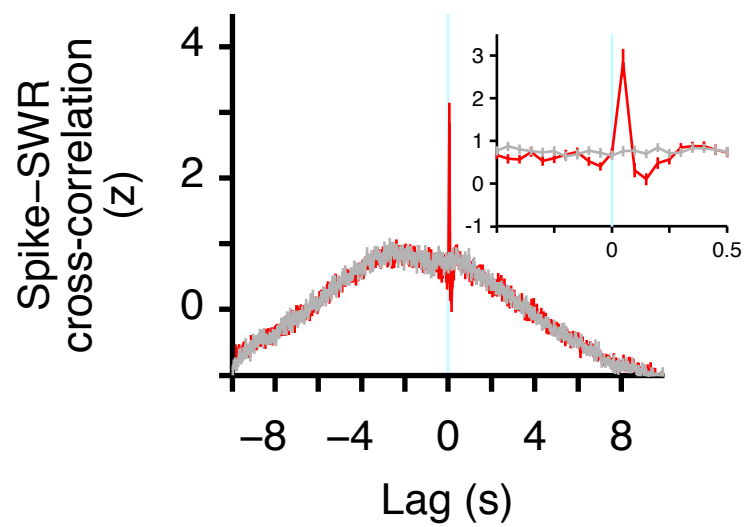

Supplement: supp [file elife-27621-supp-v1.zip]

Figure 1 -figure supplement 4

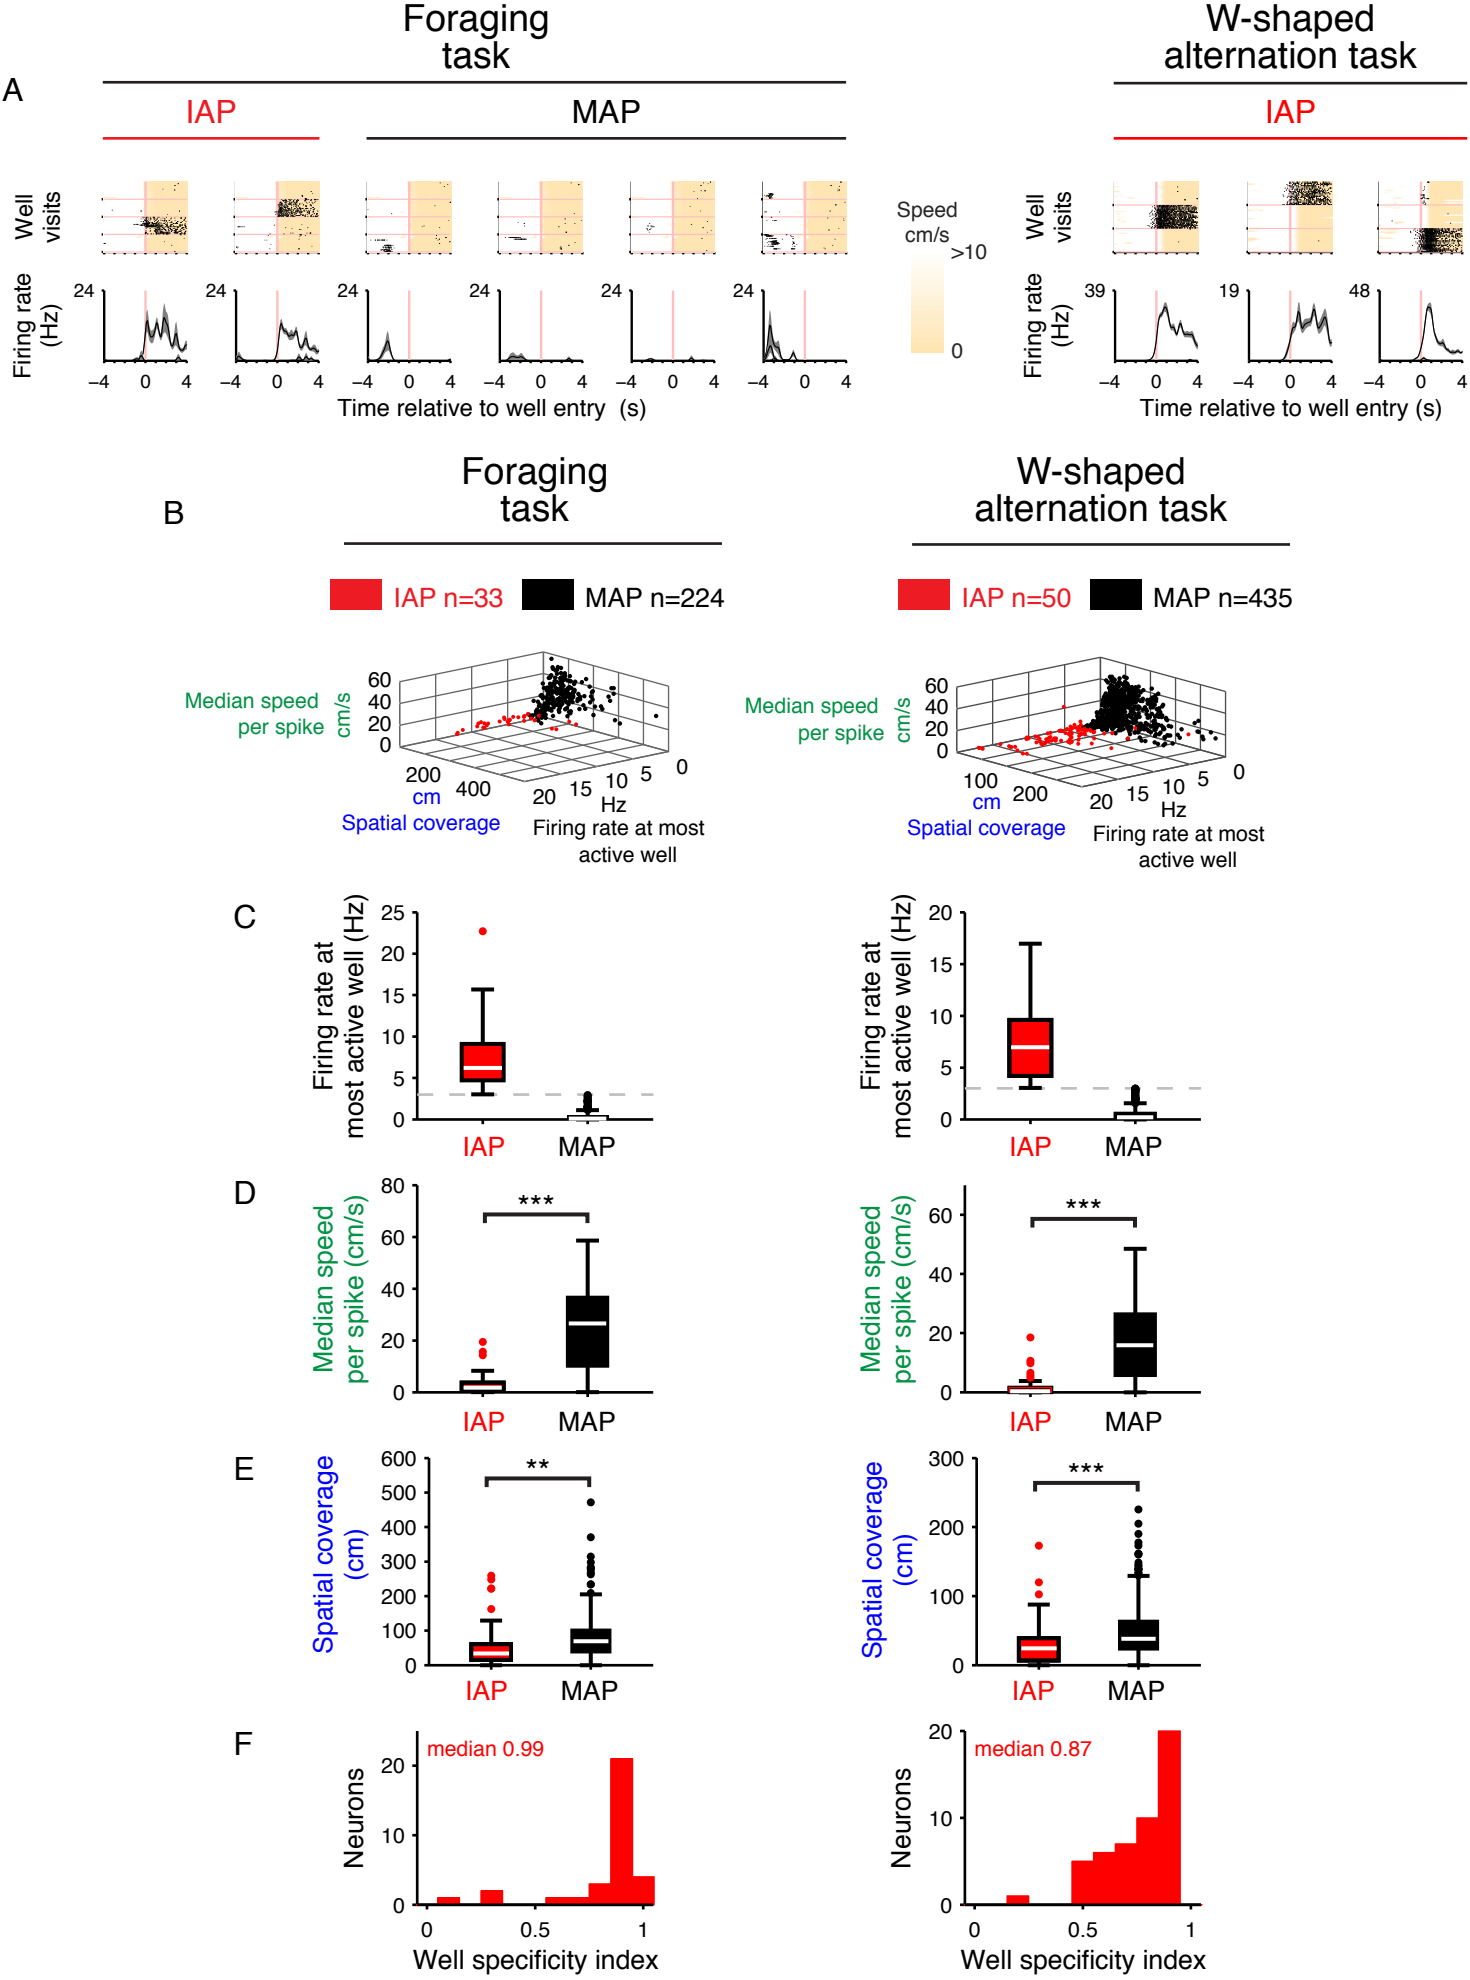

Supplement: supp [file elife-27621-supp-v1.zip]

Figure 1 -figure supplement 3

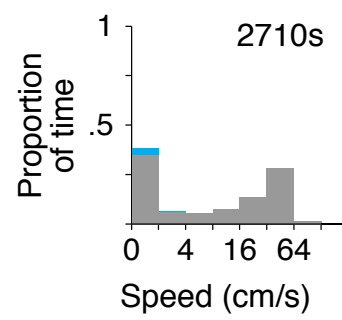

Supplement: supp [file elife-27621-supp-v1.zip]

Figure 5 - figure supplement 1

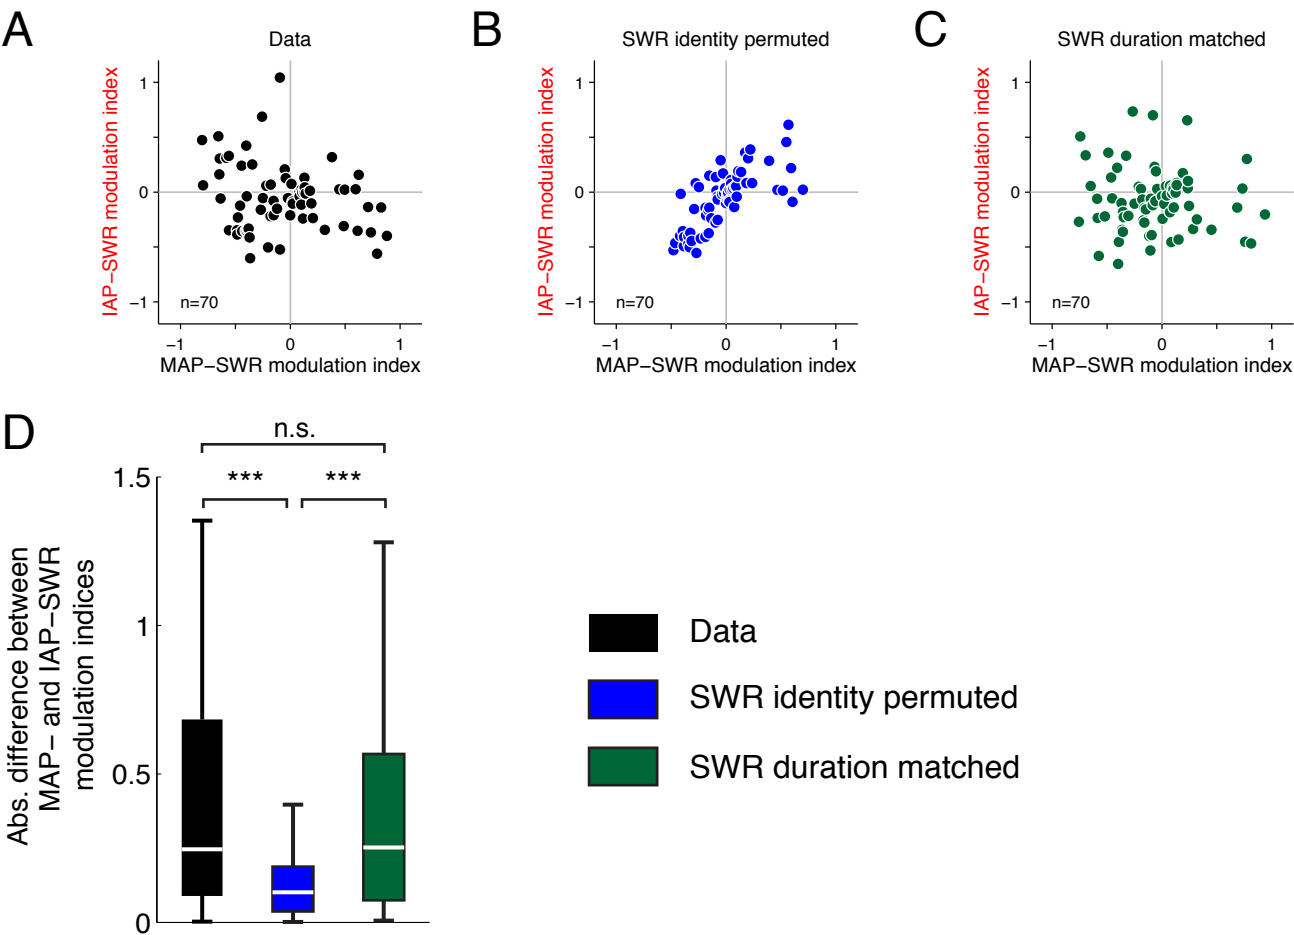

Supplement: supp [file elife-27621-supp-v1.zip]

Figure 4 - figure supplement 5

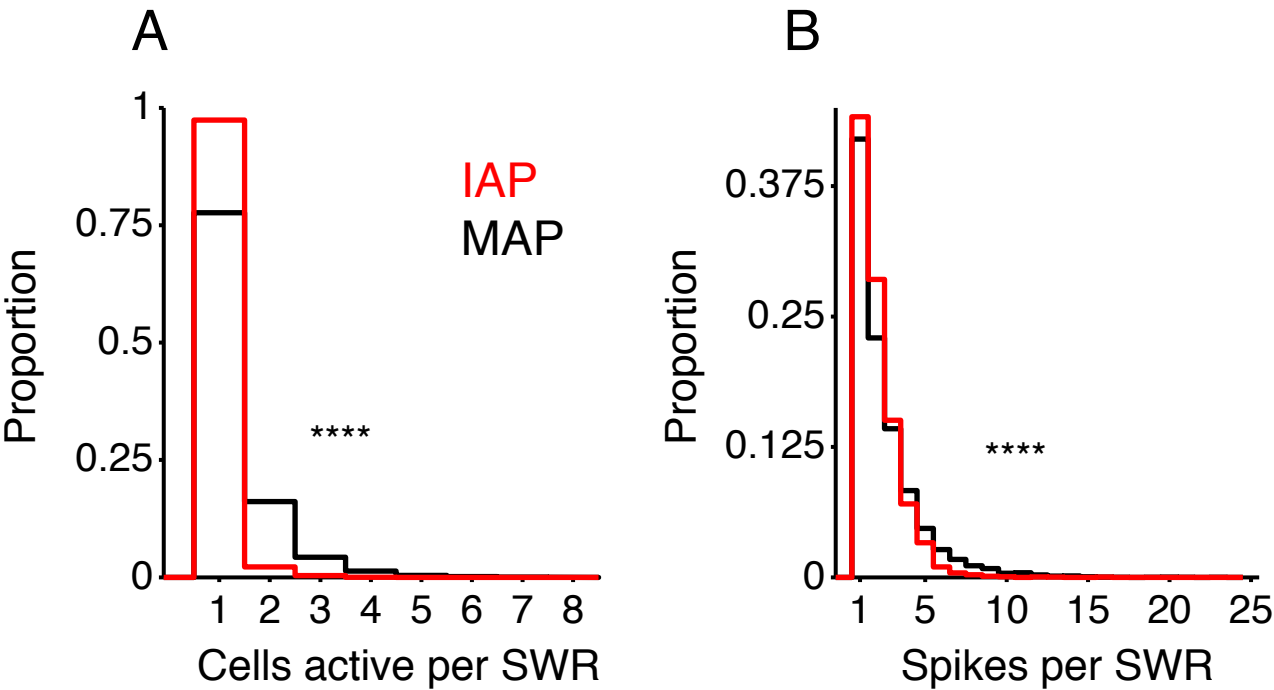

Supplement: supp [file elife-27621-supp-v1.zip]

Figure 6 - figure supplement 2

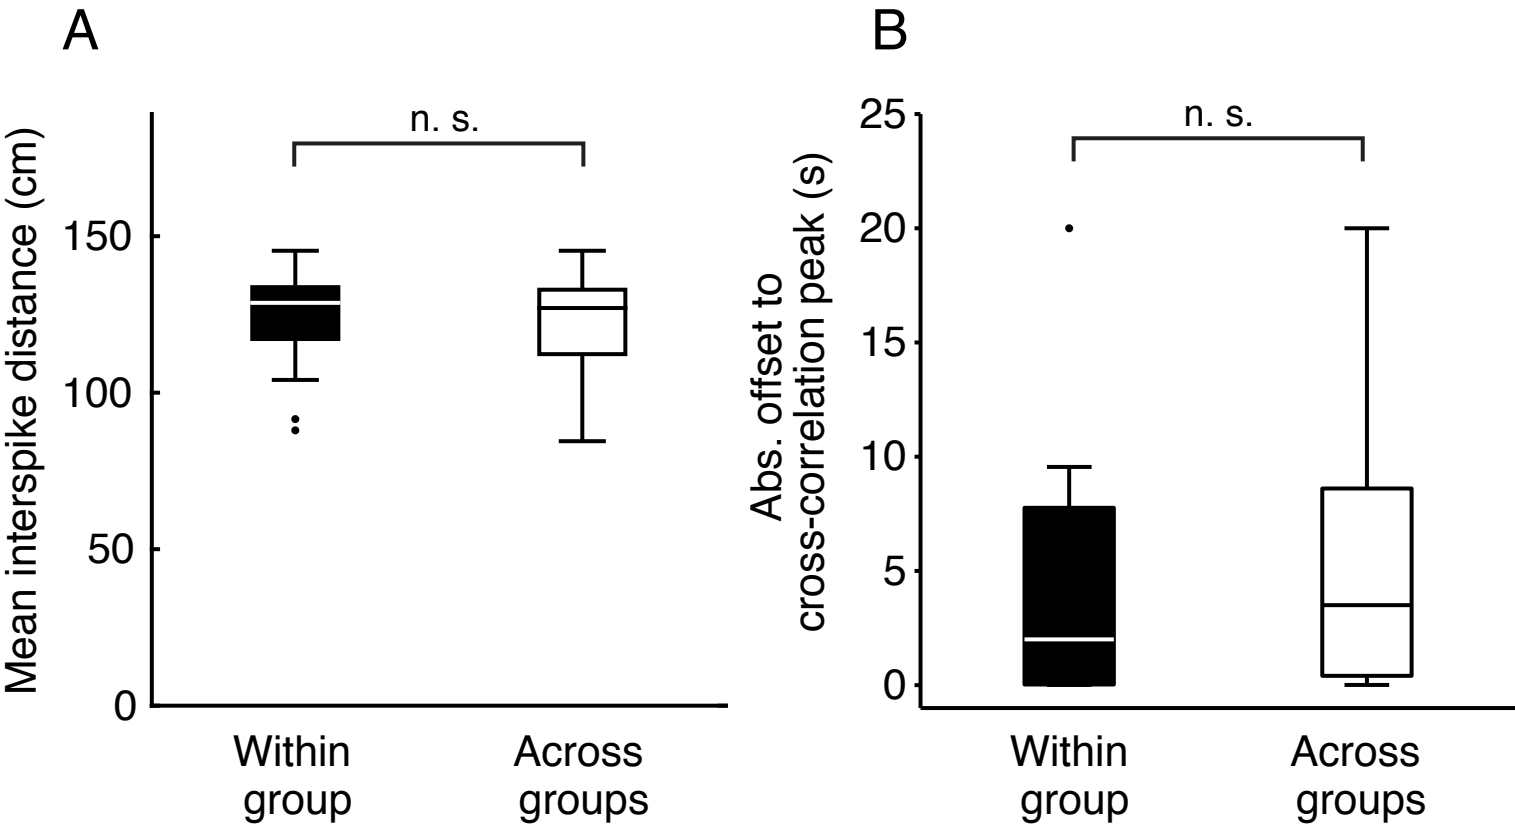

Supplement: supp [file elife-27621-supp-v1.zip]

Figure 2 - figure supplement 1

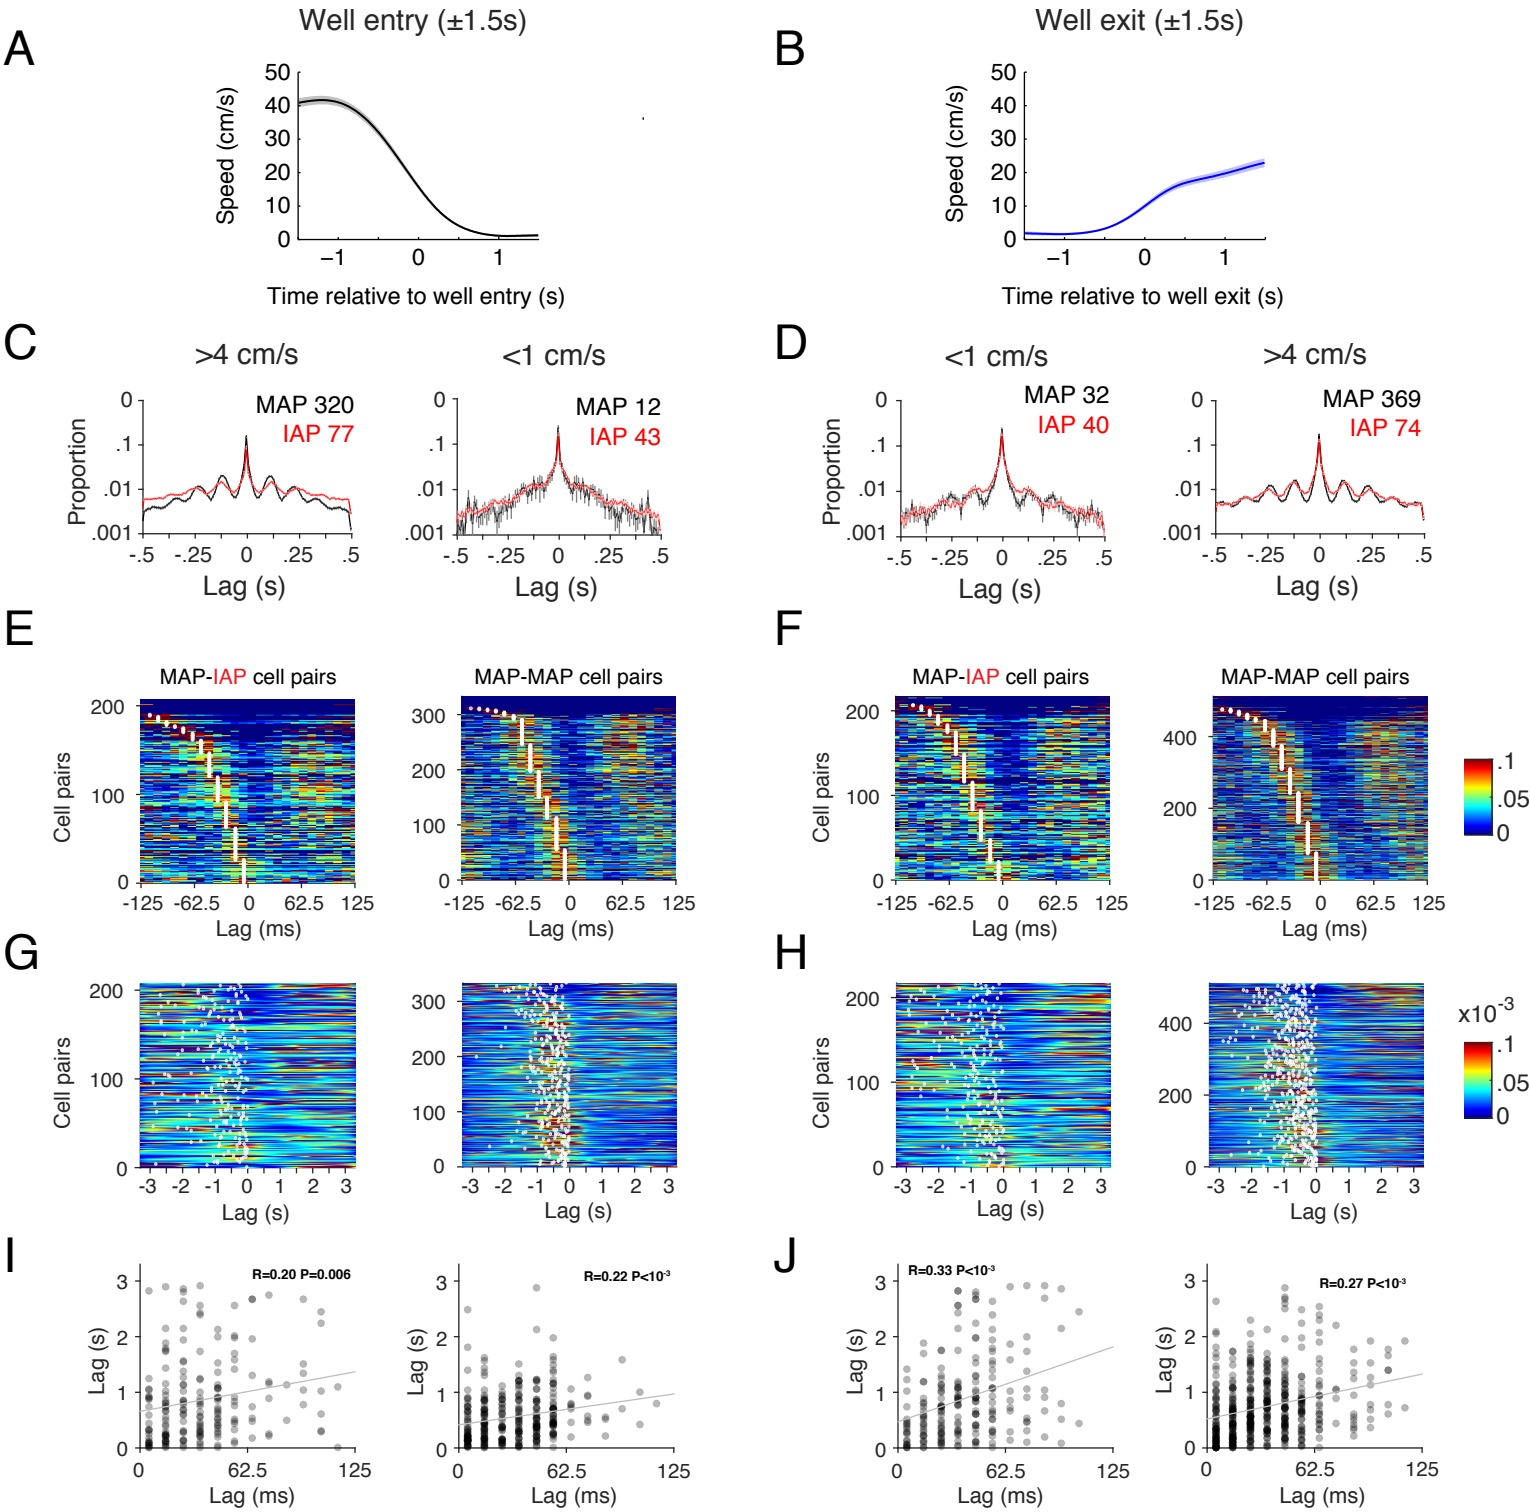

Supplement: supp [file elife-27621-supp-v1.zip]

Figure 4 - figure supplement 3

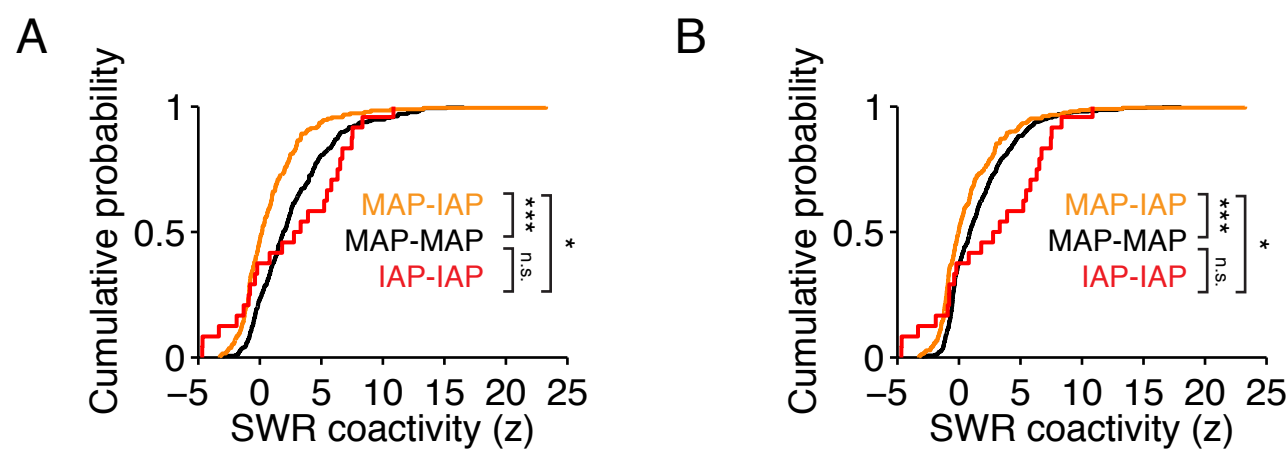

Supplement: supp [file elife-27621-supp-v1.zip]

Figure 2 - figure supplement 2

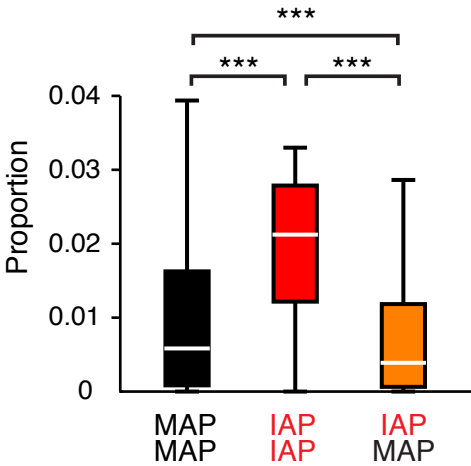

Supplement: supp [file elife-27621-supp-v1.zip]

Figure 3 - figure supplement 1

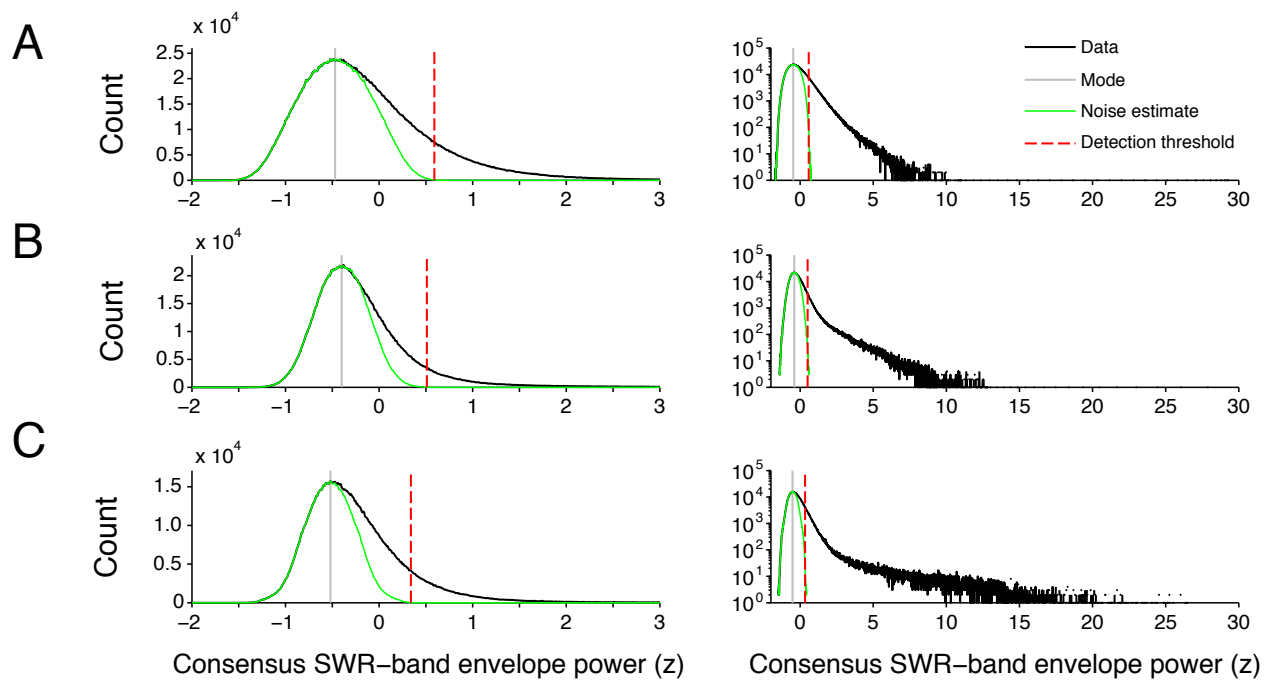

Supplement: supp [file elife-27621-supp-v1.zip]

Figure 4 - figure supplement 6

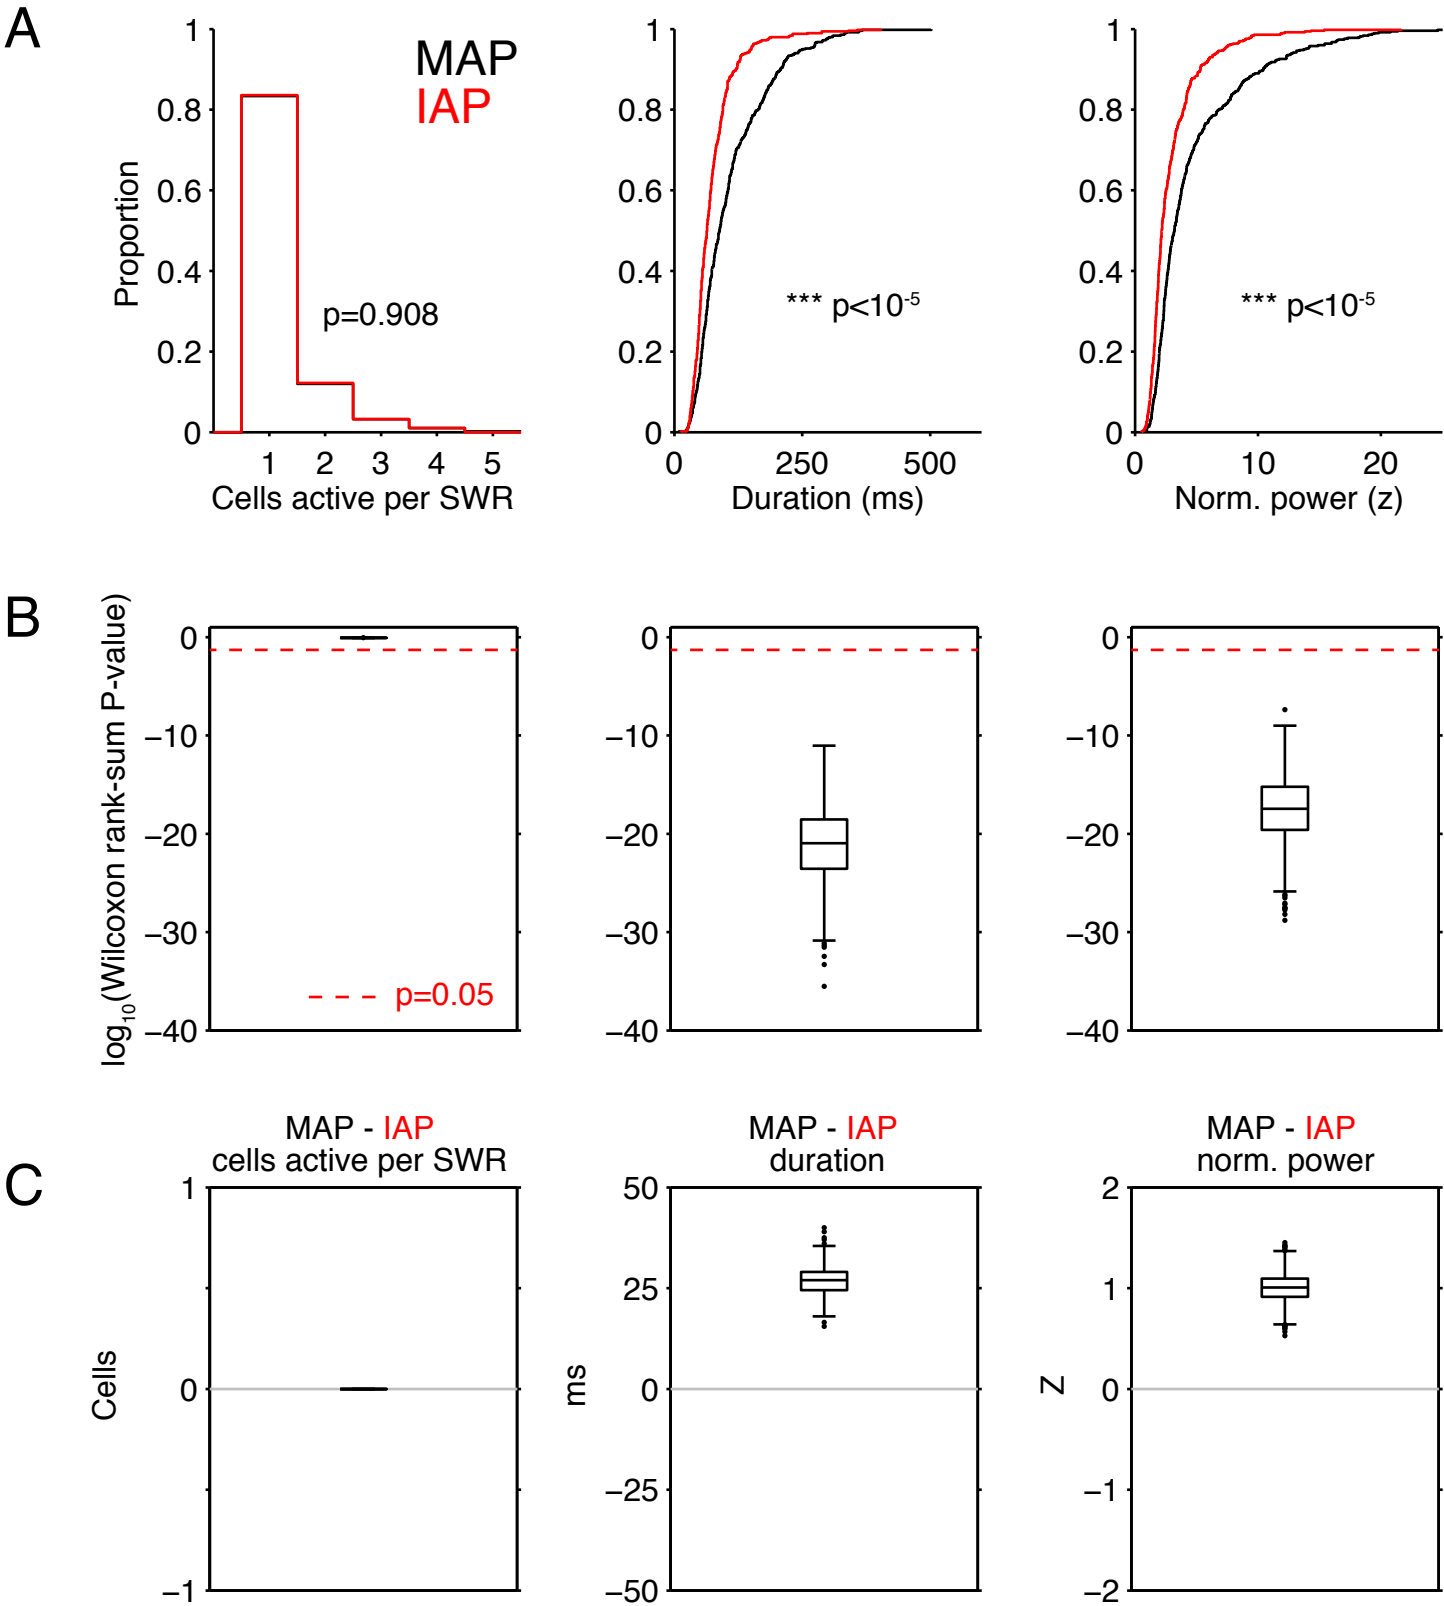

Supplement: supp [file elife-27621-supp-v1.zip]

Figure 4 - figure supplement 4

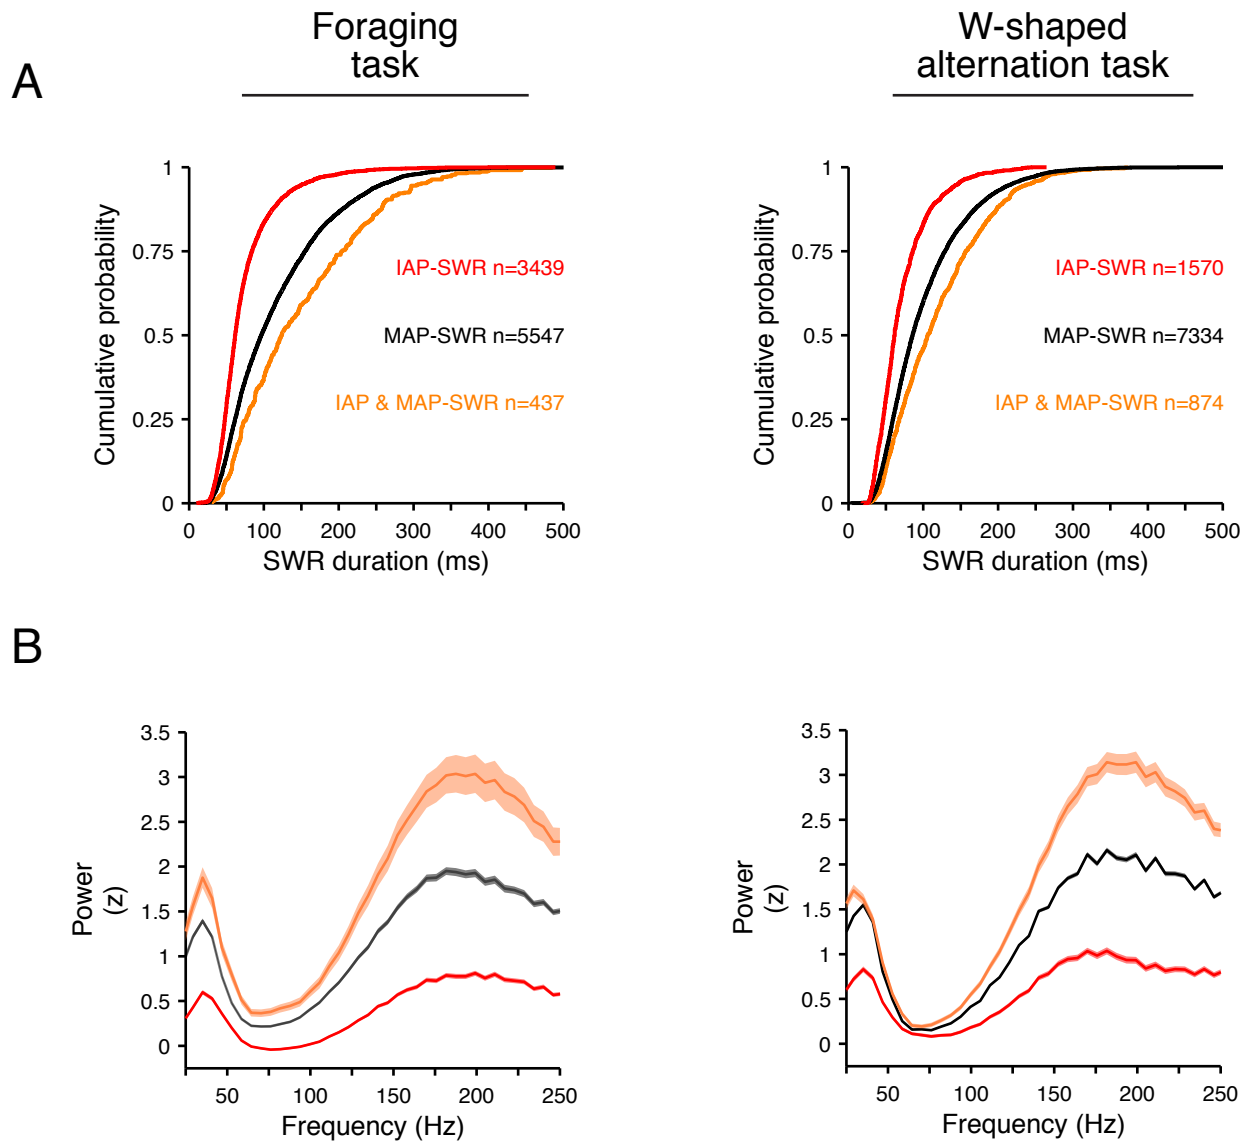

Supplement: supp [file elife-27621-supp-v1.zip]

Figure 4 - figure supplement 1

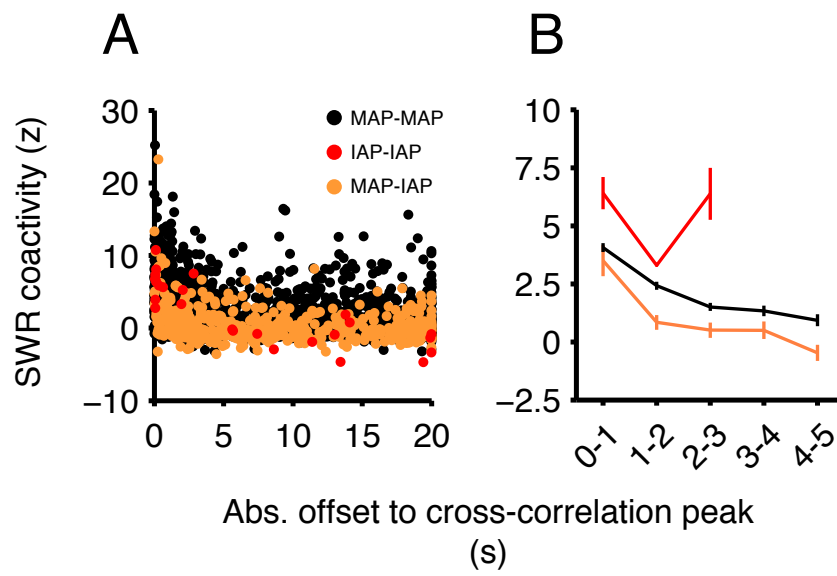

Supplement: supp [file elife-27621-supp-v1.zip]

Figure 1 - figure supplement 2

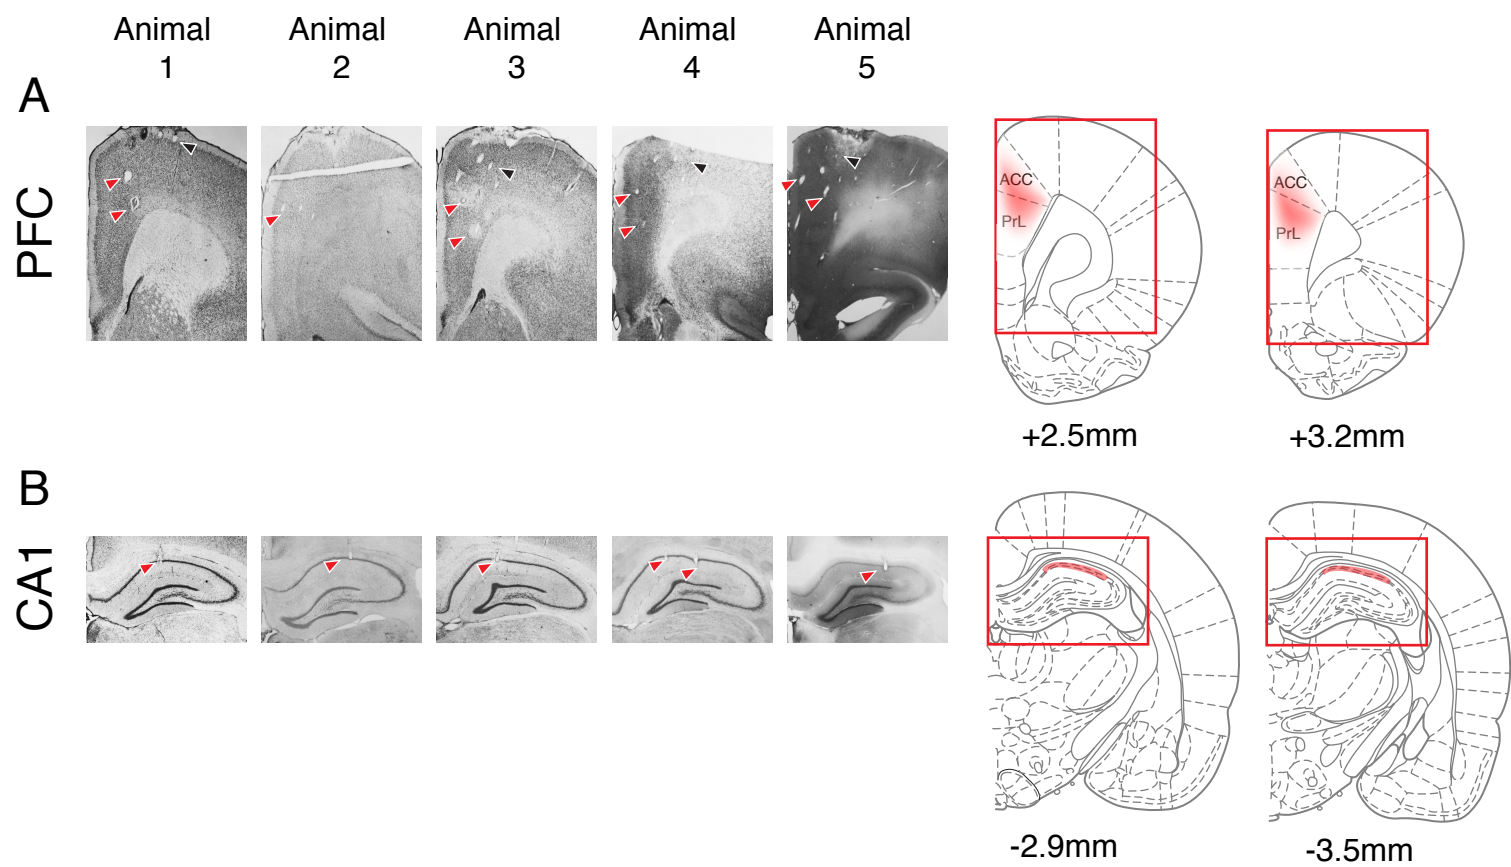

Supplement: supp [file elife-27621-supp-v1.zip]

Figure 5 - figure supplement 2

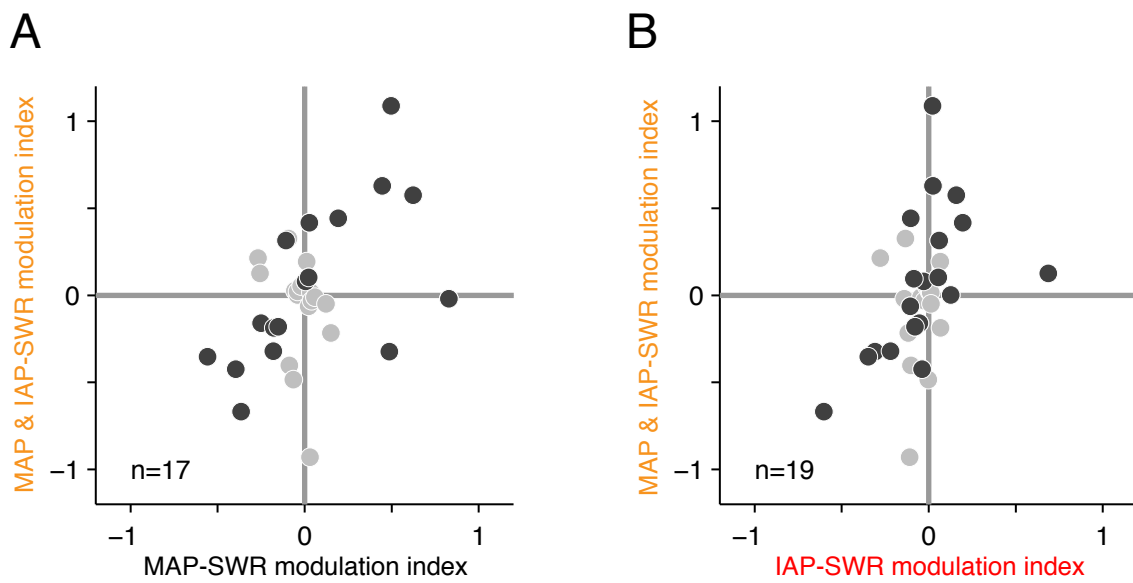

Supplement: supp [file elife-27621-supp-v1.zip]

Figure 6 - figure supplement 1

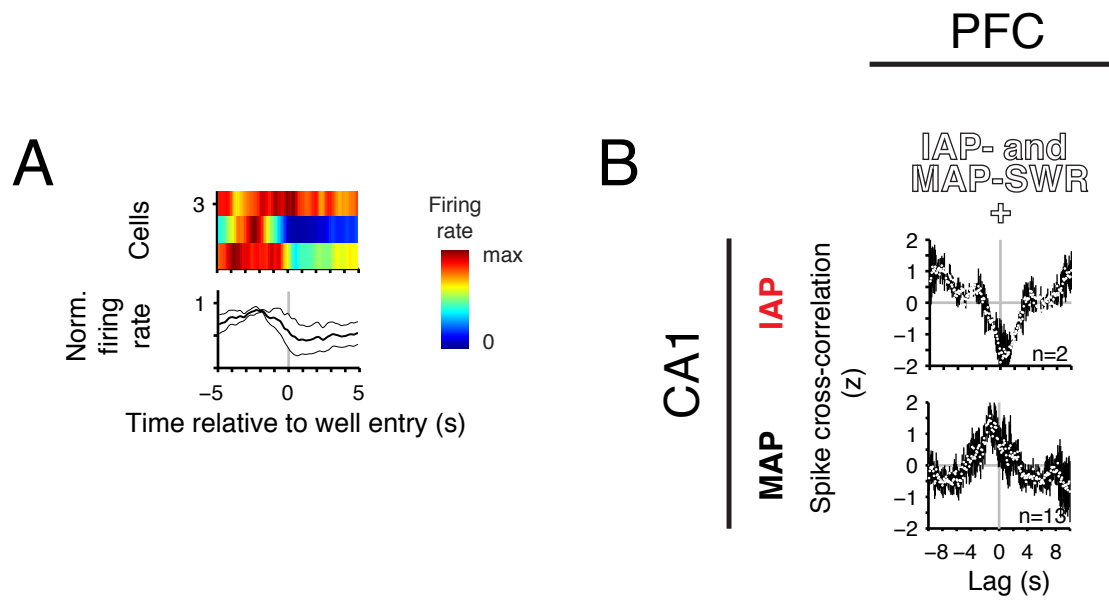

Supplement: supp [file elife-27621-supp-v1.zip]

Figure 3 - figure supplement 3

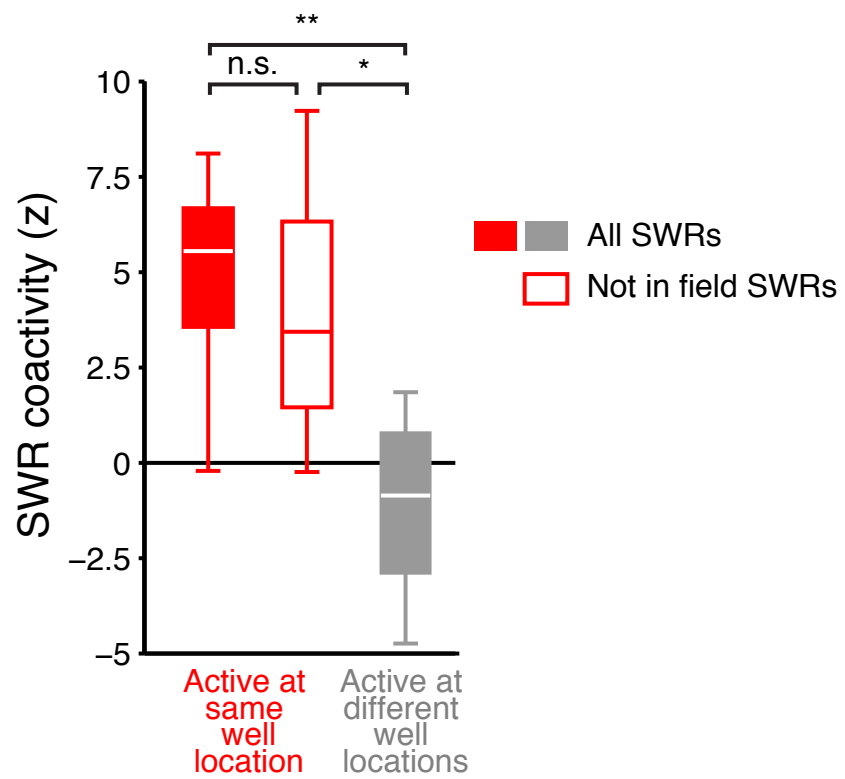

Supplement: supp [file elife-27621-supp-v1.zip]

Figure 4 - figure supplement 2

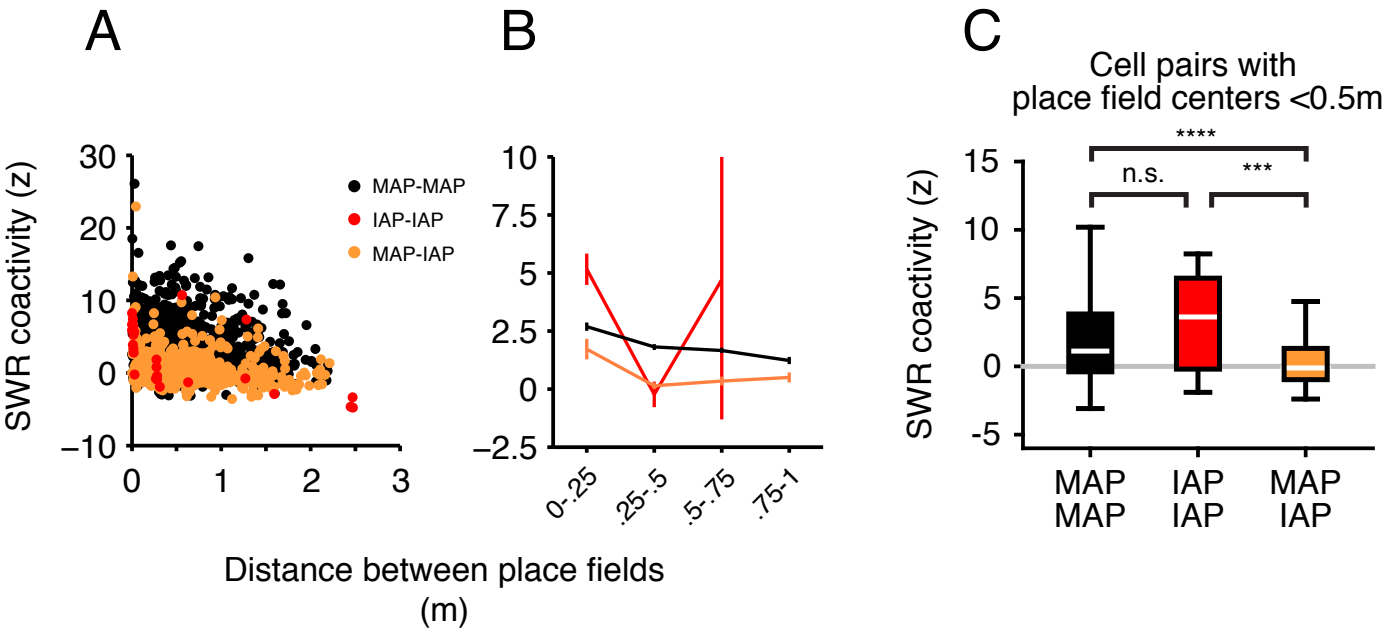

Supplement: supp [file elife-27621-supp-v1.zip]
